# Supplementary material
Source: PubMed Central journal article supplement (PMC5881050)
Supplement: AEM.02872-17_zam008188445s1.pdf [file AEM.02872-17_zam008188445s1.pdf]

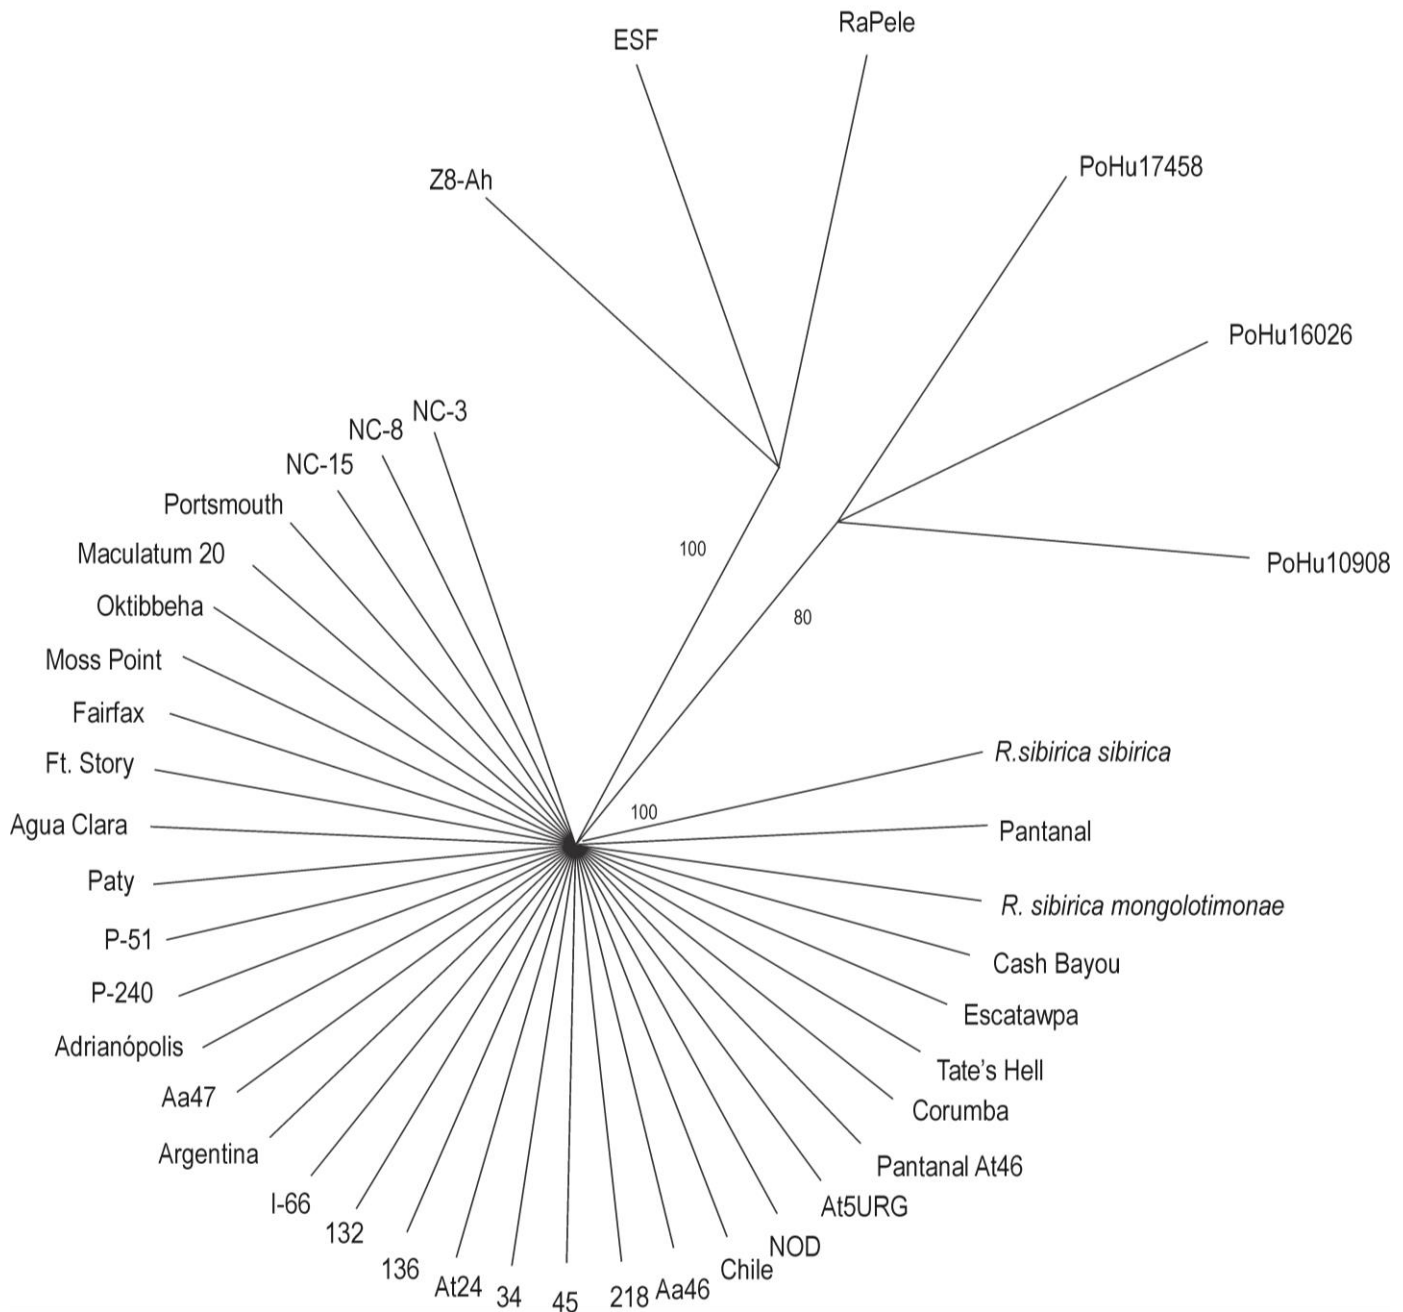

**Supplemental Figure S1.** Molecular phylogenetic analysis of New World isolates of *Rickettsia parkeri* sensu stricto, strains Atlantic rainforest, NOD, and Parvitarsum, in relation to Old World isolates of *Rickettsia africae*, *Rickettsia sibirica*, and *Rickettsia conorii*, inferred from a partial sequence of the rickettsial *gltA* gene (257 nt). Please refer to Table 1 for data about the rickettsial isolates.

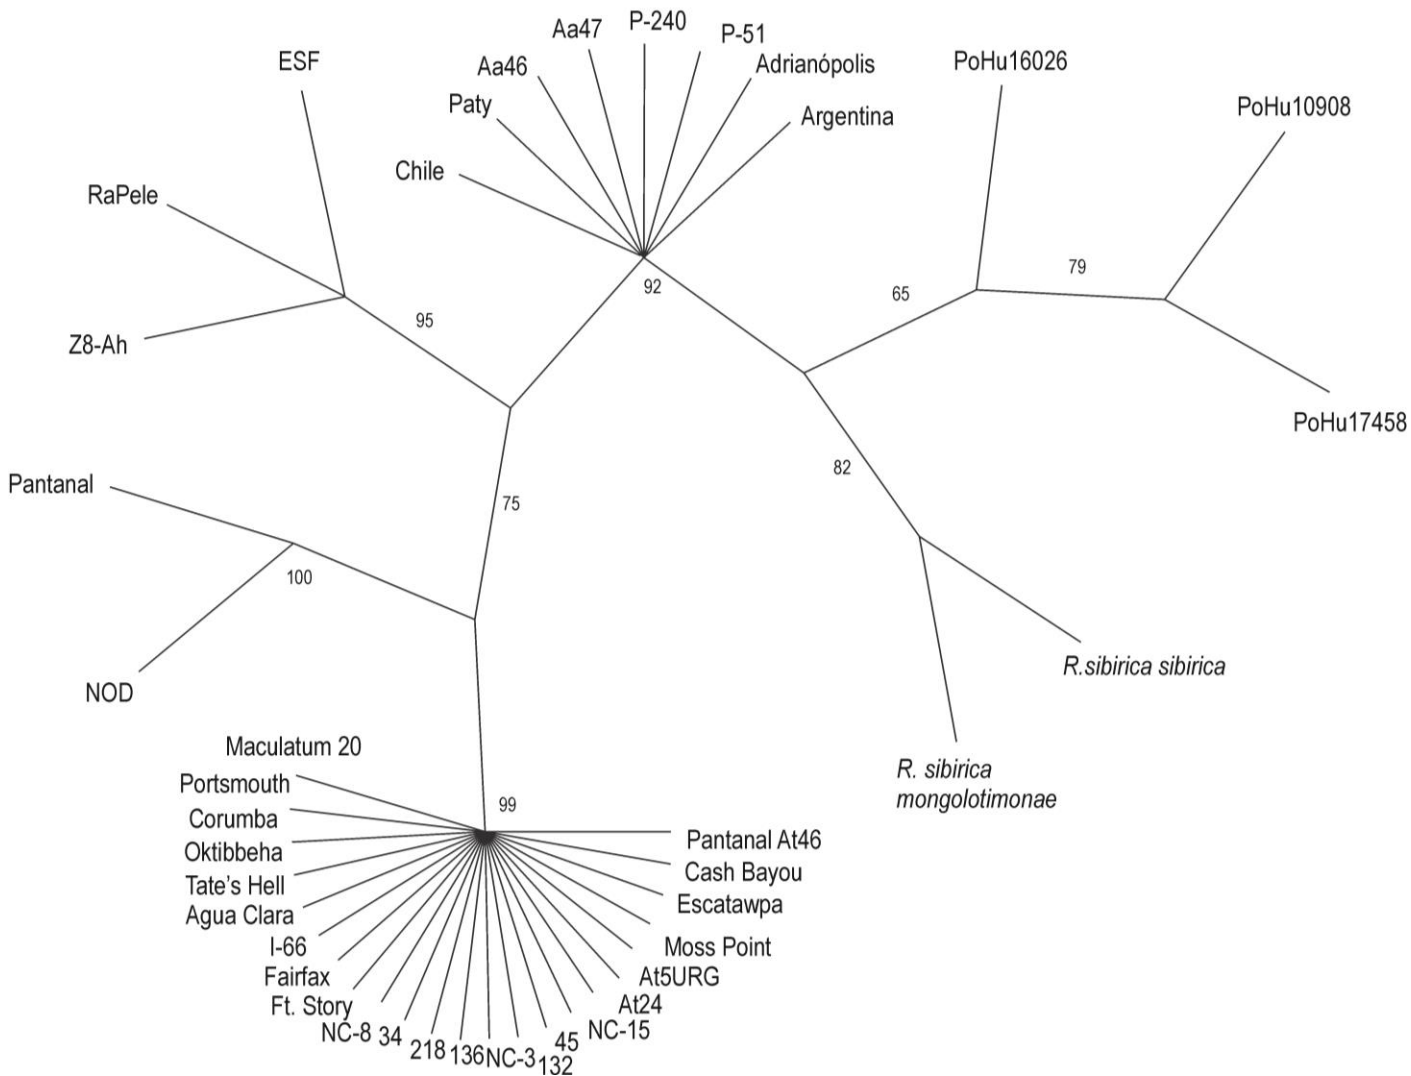

**Supplemental Figure S2.** Molecular phylogenetic analysis of New World isolates of *Rickettsia parkeri* sensu stricto, strains Atlantic rainforest, NOD, and Parvitarsum, in relation to Old World isolates of *Rickettsia africae*, *Rickettsia sibirica*, and *Rickettsia conorii*, inferred from a partial sequence of the rickettsial *ompA* gene (490 nt). Please refer to Table 1 for data about the rickettsial isolates.

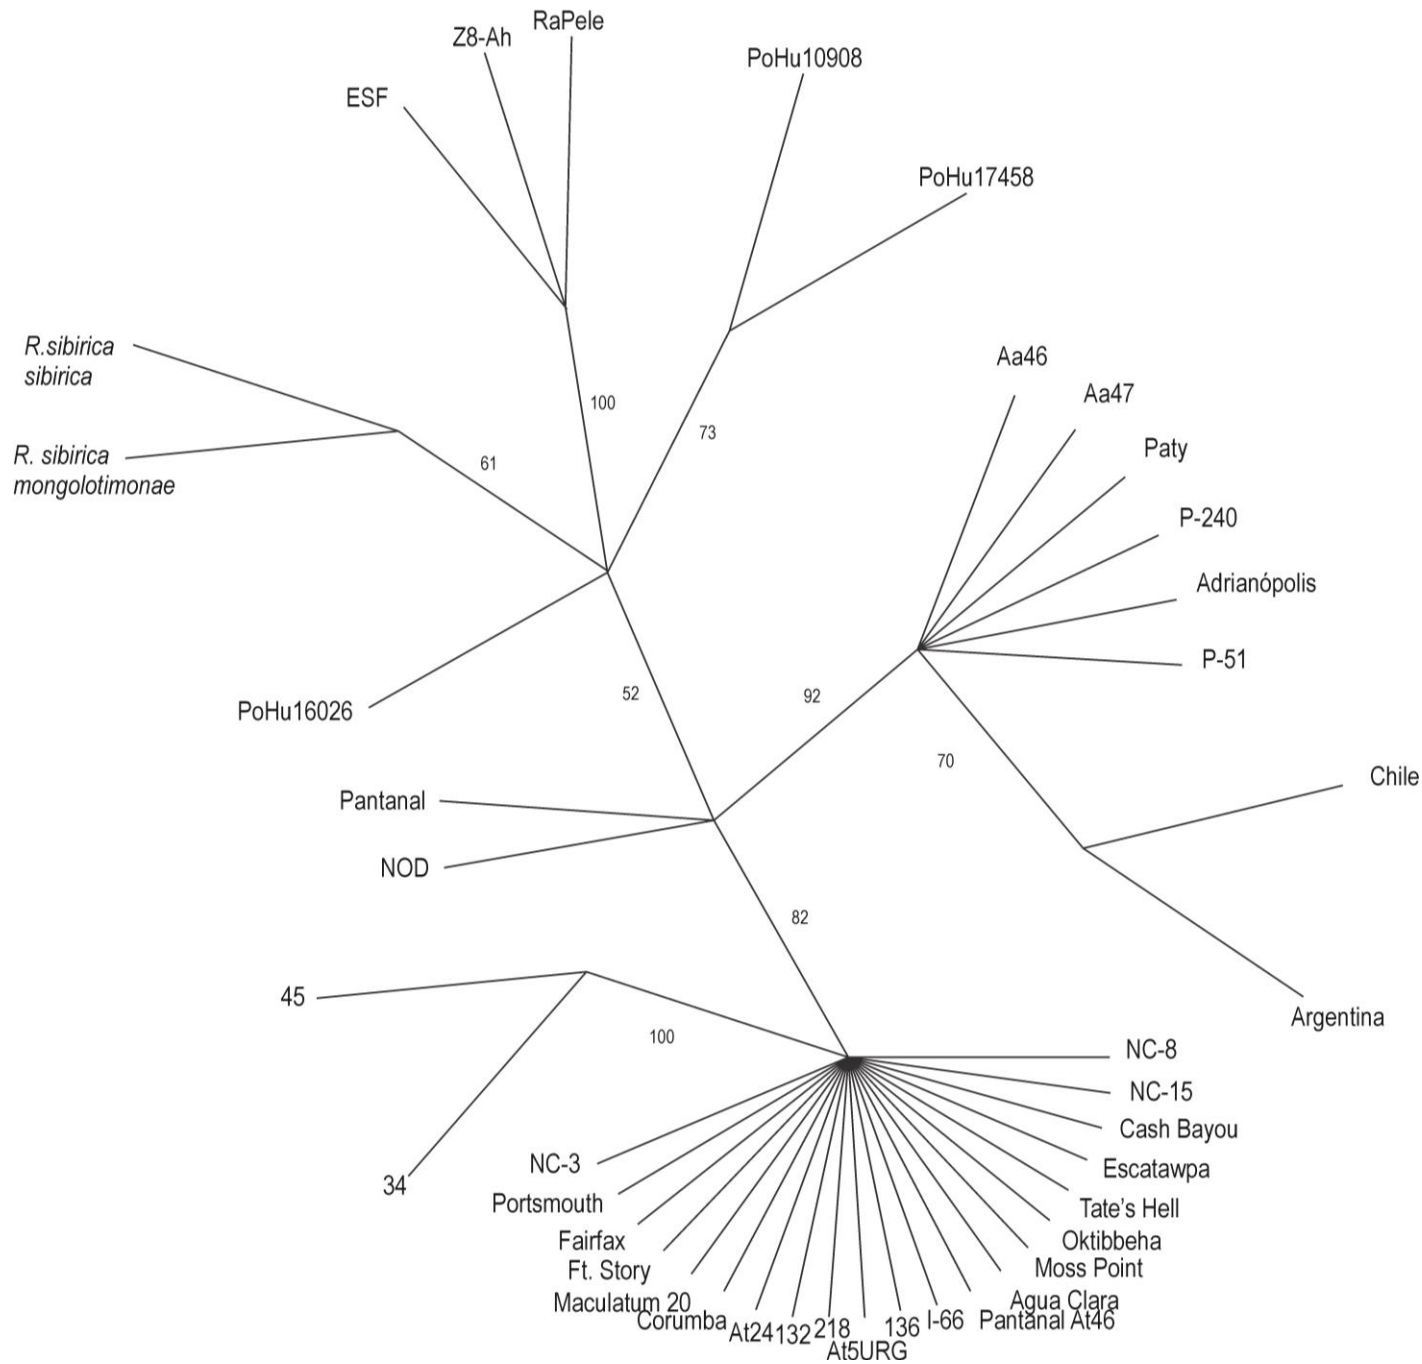

**Supplemental Figure S3.** Molecular phylogenetic analysis of New World isolates of *Rickettsia parkeri* sensu stricto, strains Atlantic rainforest, NOD, and Parvitarsum, in relation to Old World isolates of *Rickettsia africae*, *Rickettsia sibirica*, and *Rickettsia conorii*, inferred from a partial sequence of the rickettsial *virB4* (684 nt). Please refer to Table 1 for data about the rickettsial isolates.

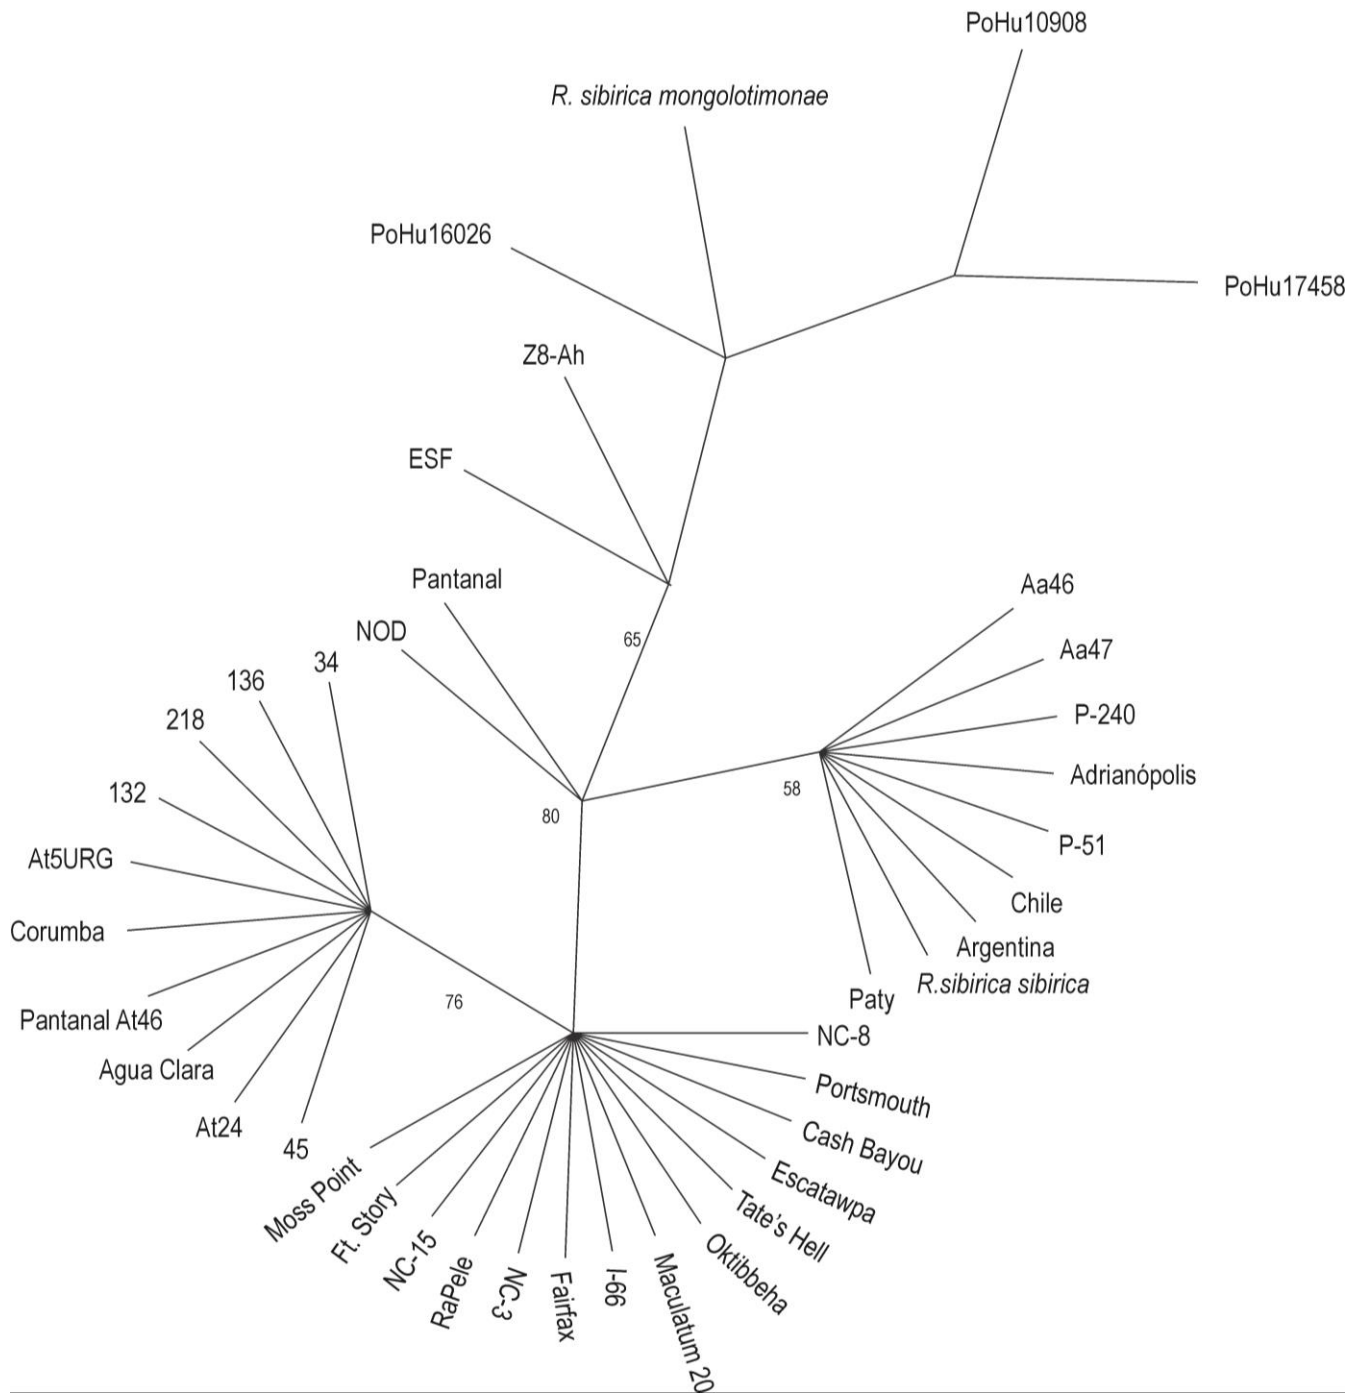

**Supplemental Figure S4.** Molecular phylogenetic analysis of New World isolates of *Rickettsia parkeri* sensu stricto, strains Atlantic rainforest, NOD, and Parvitarsum, in relation to Old World isolates of *Rickettsia africae*, *Rickettsia sibirica*, and *Rickettsia conorii*, inferred from a partial sequence of the rickettsial *dnaA* gene (663 nt). Please refer to Table 1 for data about the rickettsial isolates.

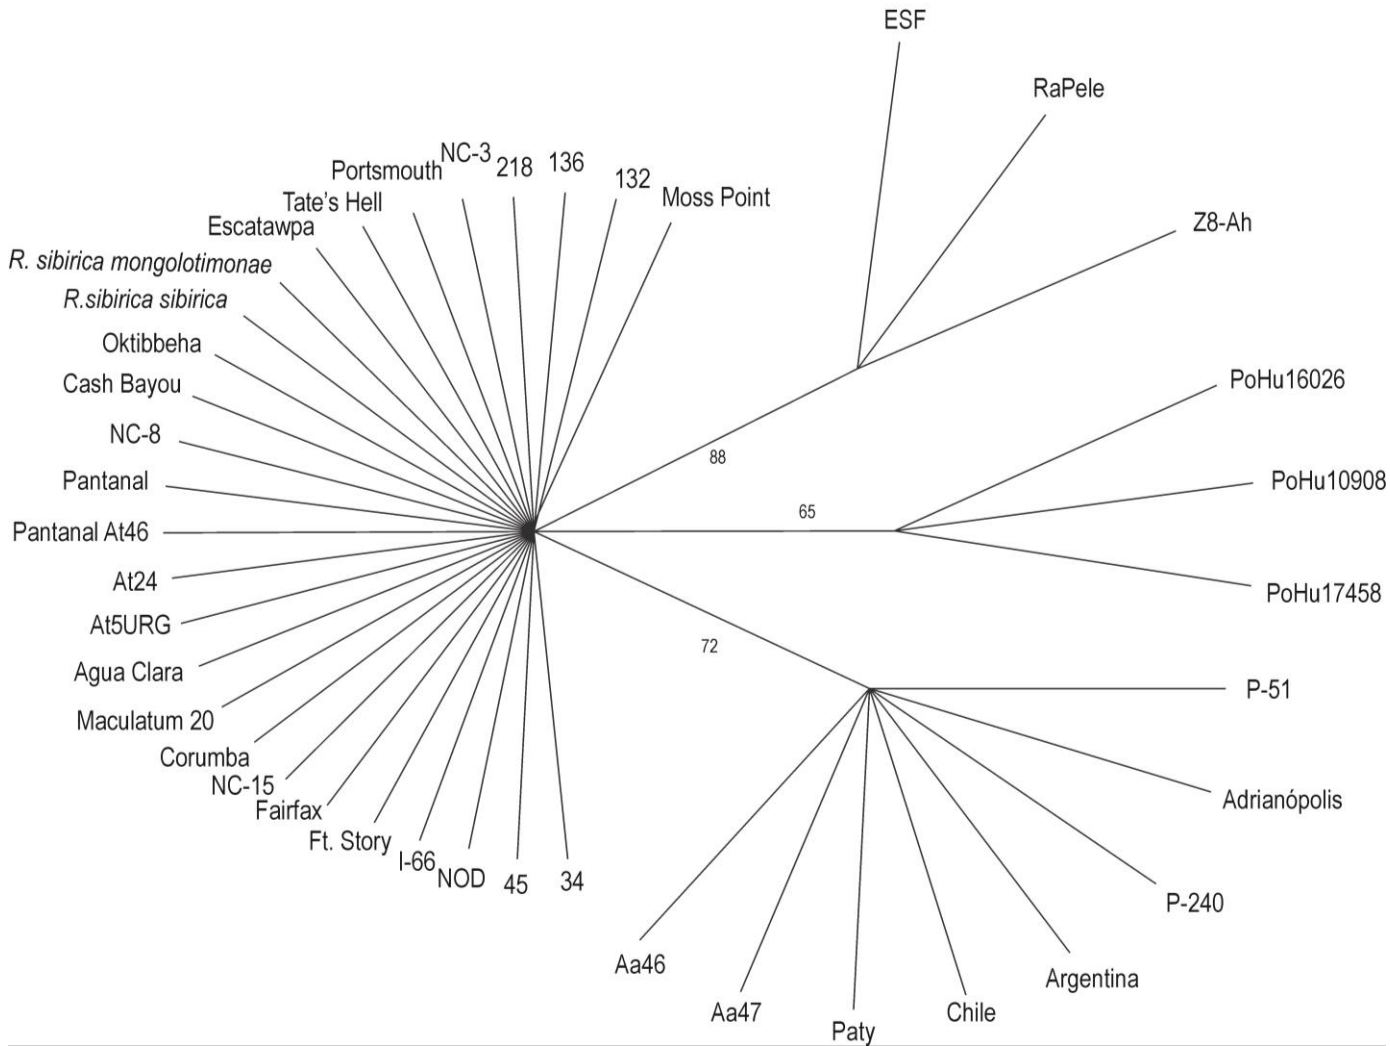

**Supplemental Figure S5.** Molecular phylogenetic analysis of New World isolates of *Rickettsia parkeri* sensu stricto, strains Atlantic rainforest, NOD, and Parvitarsum, in relation to Old World isolates of *Rickettsia africae*, *Rickettsia sibirica*, and *Rickettsia conorii*, inferred from a partial sequence of the rickettsial *dnaK* gene (615 nt). Please refer to Table 1 for data about the rickettsial isolates.

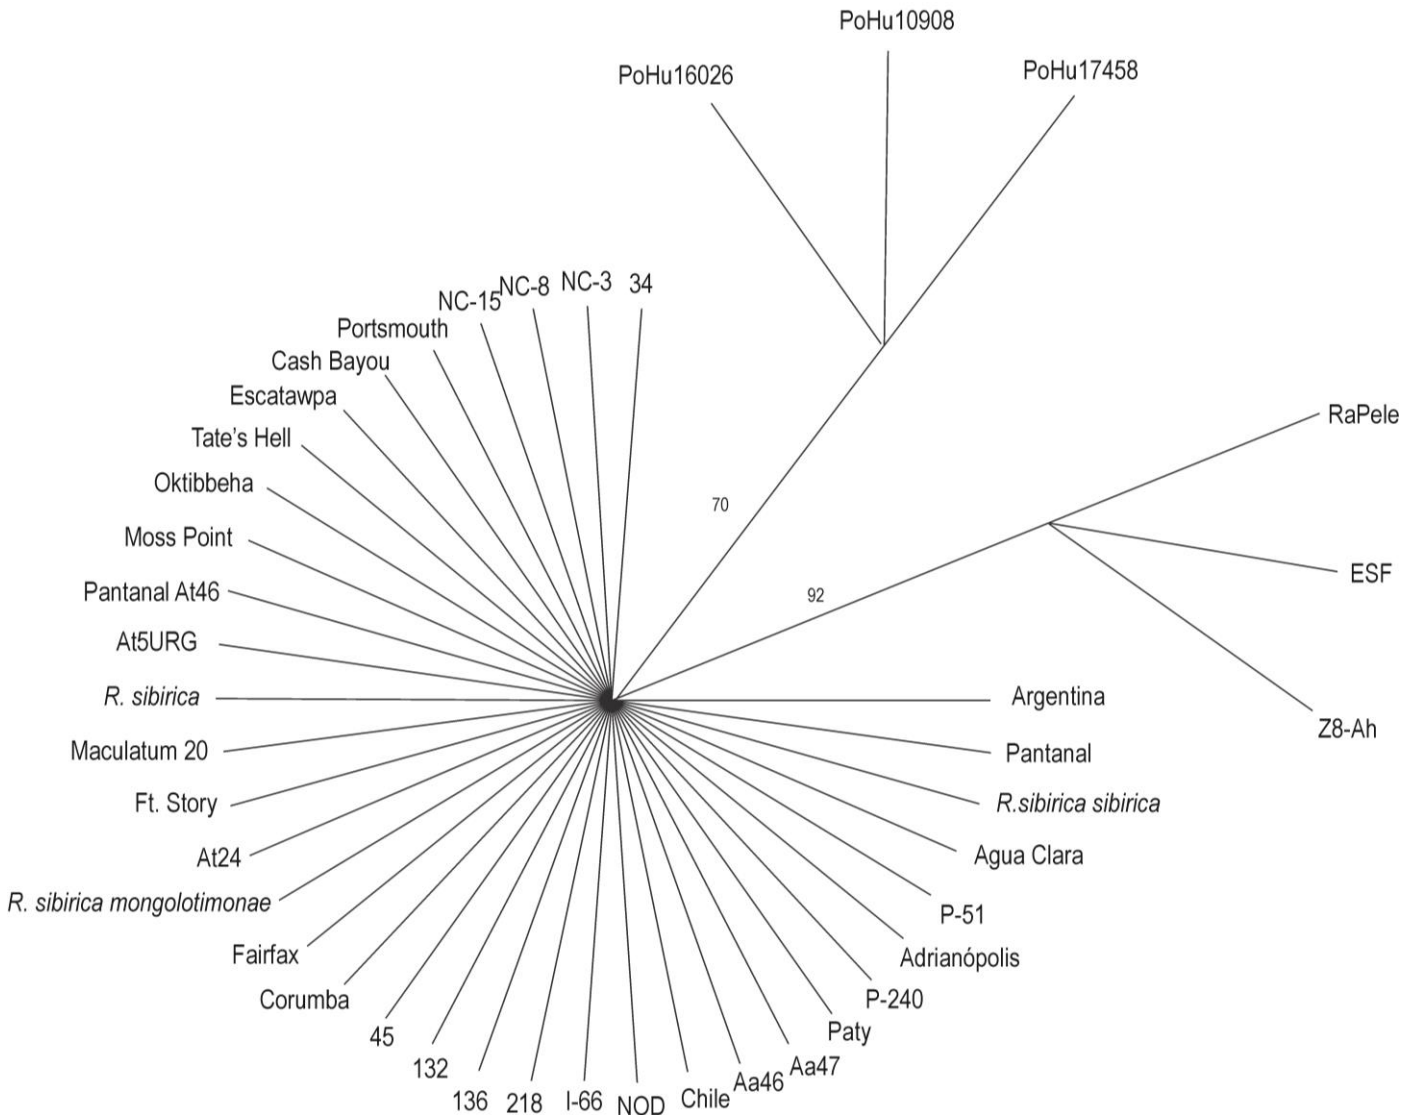

**Supplemental Figure S6.** Molecular phylogenetic analysis of New World isolates of *Rickettsia parkeri* sensu stricto, strains Atlantic rainforest, NOD, and Parvitarsum, in relation to Old World isolates of *Rickettsia africae*, *Rickettsia sibirica*, and *Rickettsia conorii*, inferred from a partial sequence of the rickettsial intergenic spacer *mppA-purC* (197 nt). Please refer to Table 1 for data about the rickettsial isolates.

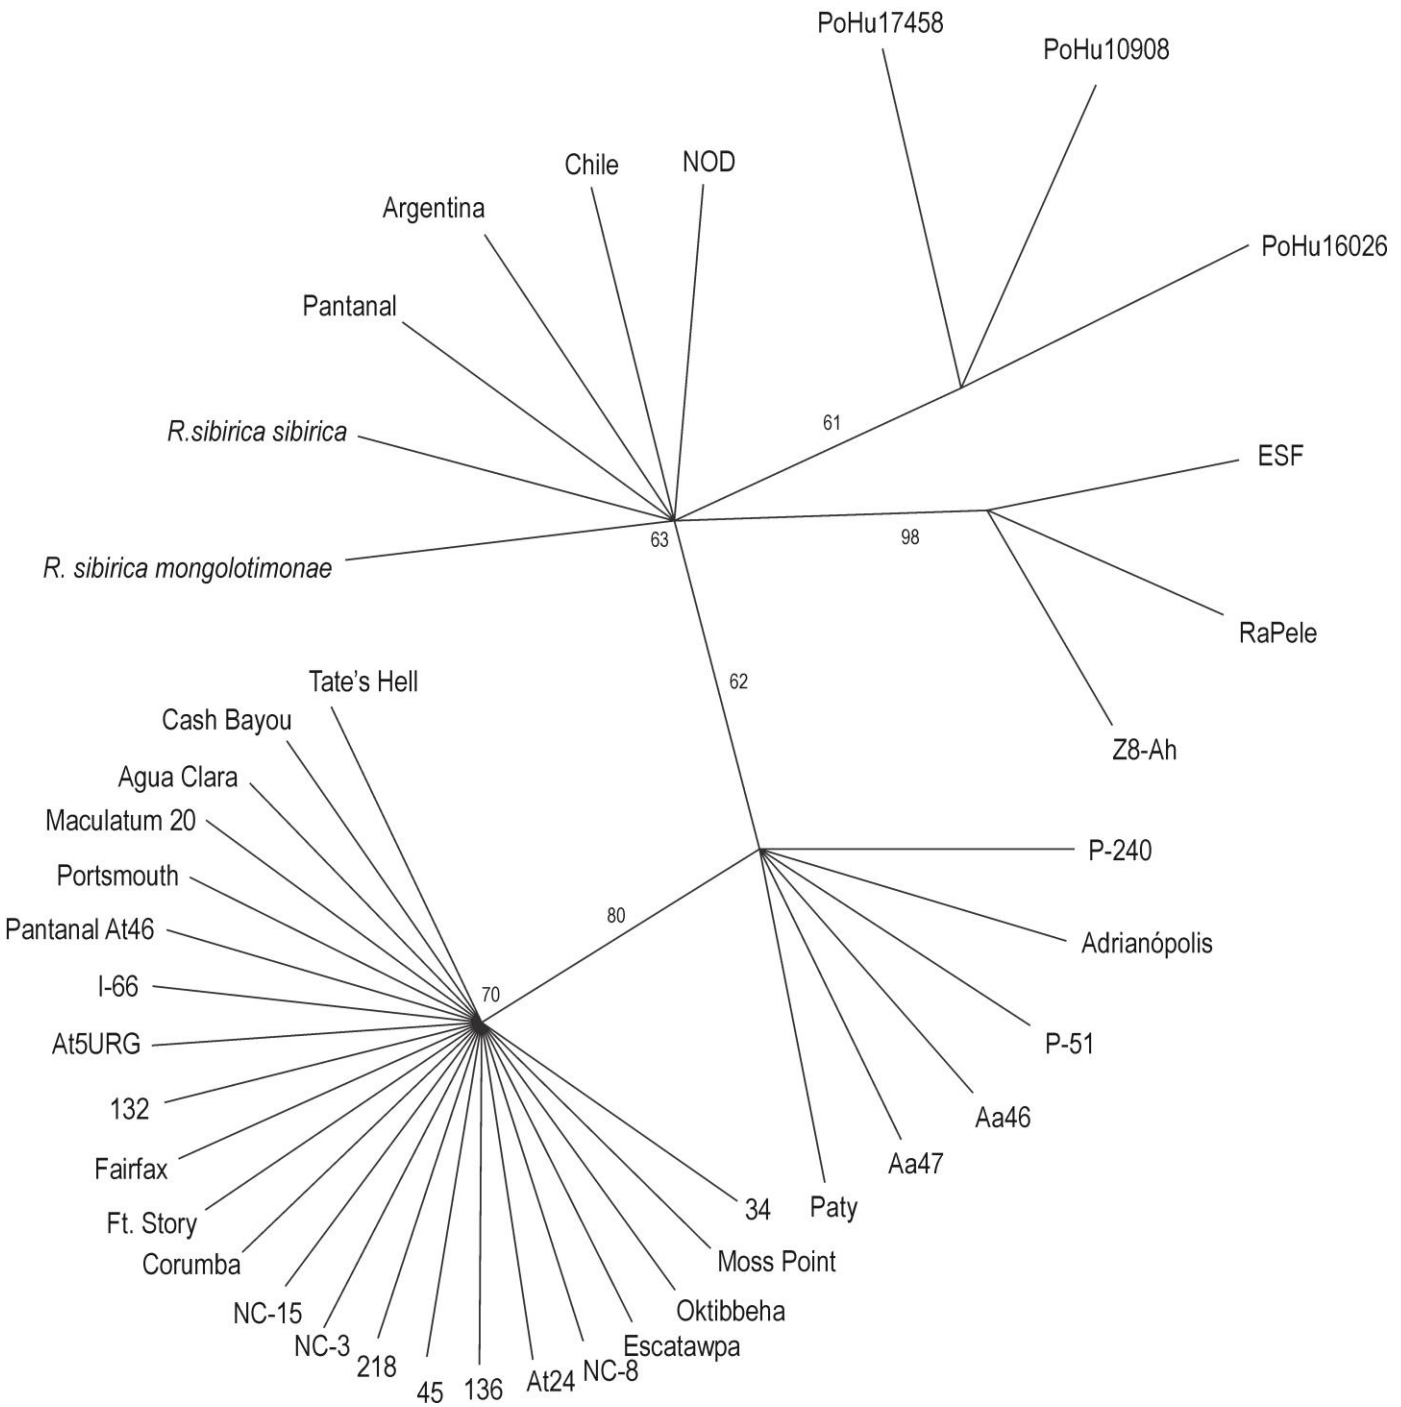

**Supplemental Figure S7.** Molecular phylogenetic analysis of New World isolates of *Rickettsia parkeri* sensu stricto, strains Atlantic rainforest, NOD, and Parvitarsum, in relation to Old World isolates of *Rickettsia africae*, *Rickettsia sibirica*, and *Rickettsia conorii*, inferred from a partial sequence of the rickettsial intergenic spacer *rrl-rrf*-ITS (330 nt). Please refer to Table 1 for data about the rickettsial isolates.

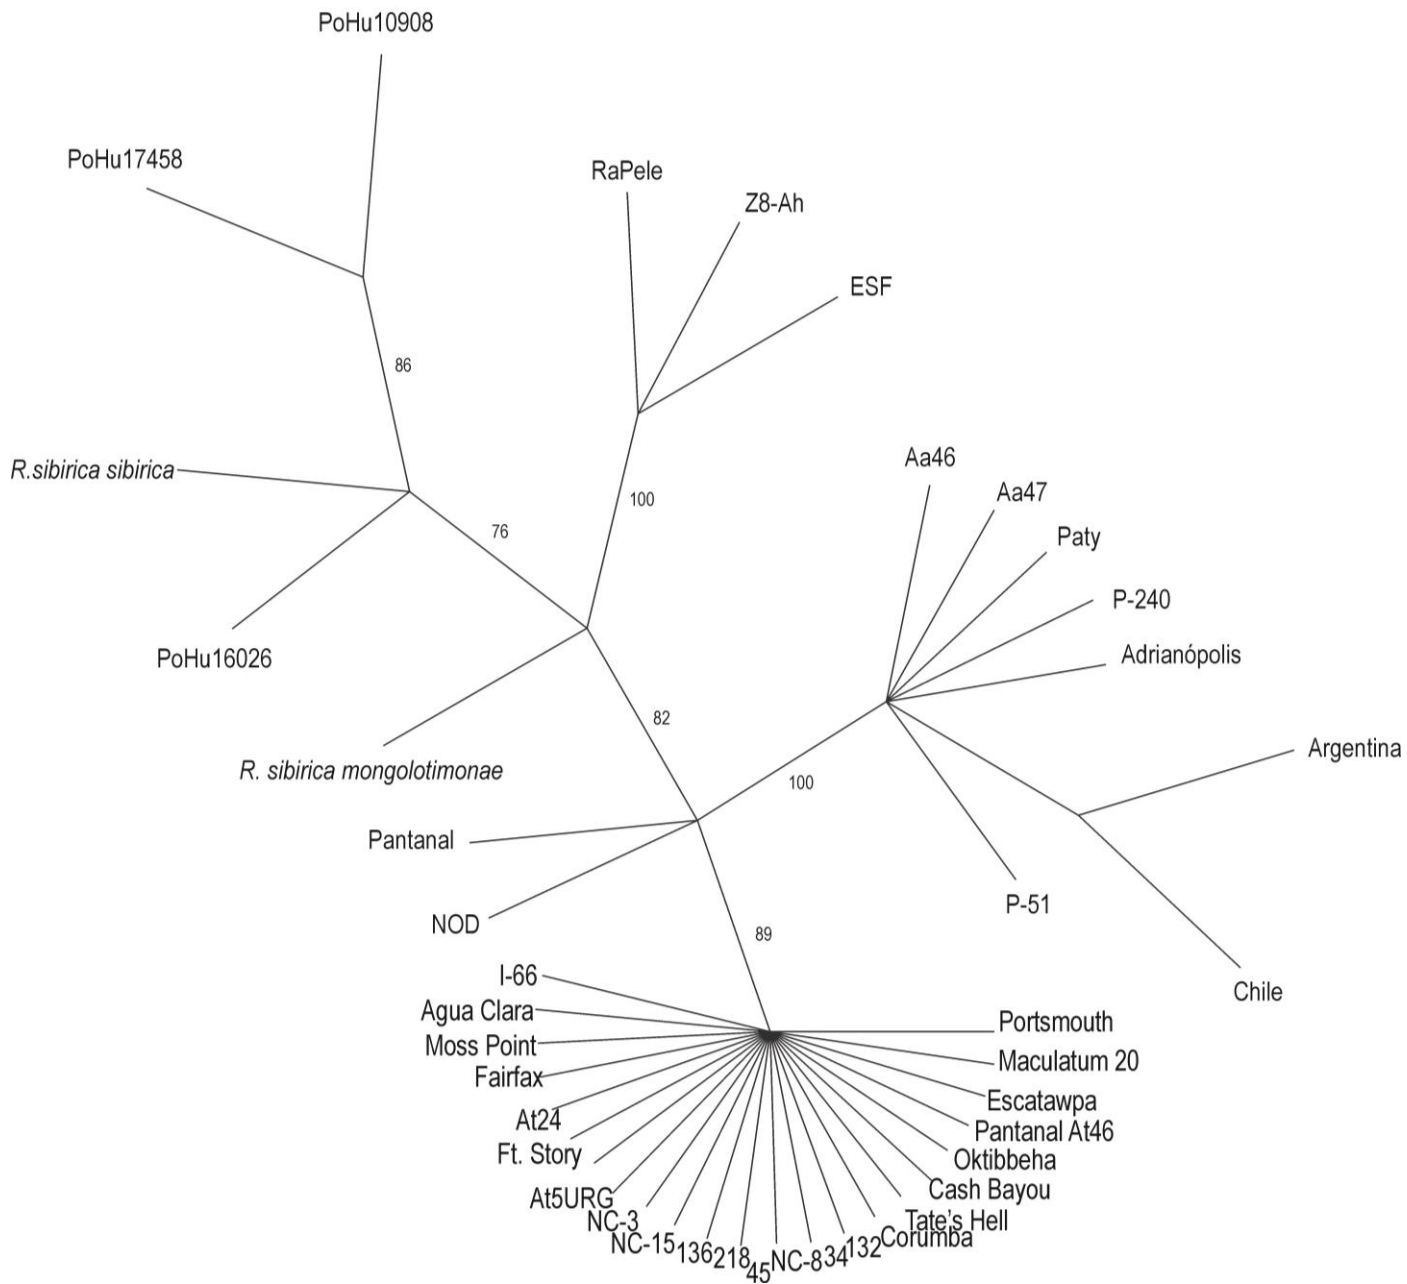

**Supplemental Figure S8.** Molecular phylogenetic analysis of New World isolates of *Rickettsia parkeri* sensu stricto, strains Atlantic rainforest, NOD, and Parvitarsum, in relation to Old World isolates of *Rickettsia africae*, *Rickettsia sibirica*, and *Rickettsia conorii*, inferred from a partial sequence of the rickettsial intergenic spacer *rpmE-tRNA<sup>fmet</sup>* (343nt). Please refer to Table 1 for data about the rickettsial isolates.
